# Supplementary material for: Change in PD-L1 and CD8 Expression after Chemoradiotherapy for Esophageal Squamous Cell Carcinoma
Source: MDPI journal article supplement (doi:10.3390/biomedicines10081888), 2022-08-04
Supplement: s1 [file s1]

## **Supplementary Material**

This appendix is provided by the authors to give readers additional information about this study.

### **Change in PD-L1 and CD8 expression after chemoradiotherapy for esophageal squamous cell carcinoma**

Wei-Chung Chen, Chun-Chieh Wu, Yi-Hsun Chen, Jui-Ying Lee, Yao-Kuang Wang, Nian-Siou Wu, Ming-Tsang Wu, I-Chen Wu

**Table S1 - Table S5**

**Figure S1 - Figure S2**

**References**

**Table S1. Clinicopathological characteristics of subgroup ESCC patients**<sup>a</sup>These patients did not provide the tumor grade in pathological reports.

| Characteristics              | With paired specimens<br>N=23<br>Mean ±SD or No. (%) | Without paired specimens<br>N= 41<br>Mean ±SD or No. (%) |
|------------------------------|------------------------------------------------------|----------------------------------------------------------|
| <b>Gender</b>                |                                                      |                                                          |
| Male                         | 22 (95.7)                                            | 39 (95.1)                                                |
| Female                       | 1 (4.3)                                              | 2 (4.9)                                                  |
| <b>Age (years)</b>           | 55.97 ±8.62                                          | 56.14 ±8.01                                              |
| <b>Pathologic status</b>     |                                                      |                                                          |
| Stage I                      | 0 (0)                                                | 10 (24.4)                                                |
| Stage II                     | 0 (0)                                                | 14 (34.1)                                                |
| Stage III                    | 22 (95.7)                                            | 14 (34.1)                                                |
| Stage IV                     | 1 (4.3)                                              | 3 (7.3)                                                  |
| <b>Tumor differentiation</b> |                                                      |                                                          |
| Grade 1 (Well)               | 3 (13.0)                                             | 2 (4.9)                                                  |
| Grade 2 (Moderate)           | 15 (65.2)                                            | 34 (82.9)                                                |
| Grade 3 (Poor)               | 3 (13.0)                                             | 3 (7.3)                                                  |
| Missing <sup>a</sup>         | 2 (8.7)                                              | 2 (4.9)                                                  |
| <b>Treatment</b>             |                                                      |                                                          |
| ESD                          | 0 (0)                                                | 5 (12.2)                                                 |
| OP                           | 0 (0)                                                | 14 (34.1)                                                |
| CCRT                         | 7 (30.4)                                             | 18 (43.9)                                                |
| CCRT then OP                 | 16 (69.6)                                            | 4 (9.8)                                                  |
| <b>CCRT Response</b>         |                                                      |                                                          |
| Without CCRT                 | 0 (0)                                                | 19 (46.3)                                                |
| Complete response            | 0 (0)                                                | 7 (17.1)                                                 |
| Partial response             | 22 (95.7)                                            | 10 (24.4)                                                |
| Stable disease               | 1 (4.3)                                              | 4 (9.8)                                                  |
| Progressive disease          | 0 (0)                                                | 1 (2.4)                                                  |
| <b>PD-L1 H-score</b>         |                                                      |                                                          |
| H-score Median < 2           | 11 (47.8)                                            | 18 (43.9)                                                |
| H-score Median ≥ 2           | 12 (52.2)                                            | 23 (56.1)                                                |

Abbreviations: ESD, Endoscopic submucosal dissection; CCRT, Concurrent chemoradiation therapy; CT, chemotherapy; OP, esophageal resection surgery

**Table S2. The H-score distribution of 64 patients.**

| <b>H-score</b> | <b>Numbers (n=64)</b> | <b>Percentage</b> |
|----------------|-----------------------|-------------------|
| 0              | 16                    | 25.00%            |
| 1              | 13                    | 20.31%            |
| 2 (Median)     | 6                     | 9.38%             |
| 4              | 1                     | 1.56%             |
| 5              | 2                     | 3.13%             |
| 8              | 1                     | 1.56%             |
| 10             | 2                     | 3.13%             |
| 12             | 1                     | 1.56%             |
| 15             | 2                     | 3.13%             |
| 19             | 1                     | 1.56%             |
| 20             | 1                     | 1.56%             |
| 25             | 2                     | 3.13%             |
| 30             | 2                     | 3.13%             |
| 45             | 1                     | 1.56%             |
| 70             | 1                     | 1.56%             |
| 75             | 2                     | 3.13%             |
| 80             | 1                     | 1.56%             |
| 90             | 1                     | 1.56%             |
| 100            | 1                     | 1.56%             |
| 105            | 1                     | 1.56%             |
| 110            | 1                     | 1.56%             |
| 150            | 1                     | 1.56%             |
| 160            | 1                     | 1.56%             |
| 170            | 1                     | 1.56%             |
| 195            | 1                     | 1.56%             |
| 200            | 1                     | 1.56%             |

**Table S3. Multivariate analysis of factors associated with overall survival in the 23 patients with paired specimens across CCRT by PD-L1 up and down regulation.**

| Variables                               |                        | No. | Adjusted HR | 95% CI      | P value |
|-----------------------------------------|------------------------|-----|-------------|-------------|---------|
| <b>Post CCRT<br/>Minus<br/>Pre CCRT</b> | PD-L1 H score          |     |             |             |         |
|                                         | Down-regulated         | 10  | 1           |             |         |
|                                         | Stable or Up-regulated | 13  | 0.466       | 0.163-1.133 | 0.154   |
|                                         | Gender                 |     |             |             |         |
|                                         | Male                   | 22  | 1           |             |         |
|                                         | Female                 | 1   | 0.000       | 0.00        | 0.990   |
|                                         | Age                    | 23  | 1.049       | 0.983-1.119 | 0.147   |

Abbreviations: HR, Hazard Ratio; CI, confidence interval

**Table S4. Multiple logistic regression analysis of factors associated with CD8 density in 15 patients before and after CCRT.**

| <b>Variables</b>                     | <b>No.</b> | <b>CD8 density<br/>(High vs Low)<sup>a</sup><br/>adjusted HR</b> | <b>95% CI</b> | <b>P<br/>value</b> |
|--------------------------------------|------------|------------------------------------------------------------------|---------------|--------------------|
| <b>PD-L1 H score (Pre<br/>CCRT)</b>  |            |                                                                  |               |                    |
| < 2                                  | 10         | 1                                                                |               |                    |
| ≥ 2                                  | 5          | 0.36                                                             | 0.03-3.95     | 0.40               |
| <b>Gender</b>                        |            |                                                                  |               |                    |
| Male                                 | 14         | 1                                                                |               |                    |
| Female                               | 1          | --                                                               |               |                    |
| <b>Age</b>                           | 15         | 0.97                                                             | 0.83-1.13     | 0.72               |
| <b>PD-L1 H score (Post<br/>CCRT)</b> |            |                                                                  |               |                    |
| < 2                                  | 10         | 1                                                                |               |                    |
| ≥ 2                                  | 5          | 1.32                                                             | 0.13-13.92    | 0.82               |
| <b>Gender</b>                        |            |                                                                  |               |                    |
| Male                                 | 14         | 1                                                                |               |                    |
| Female                               | 1          | --                                                               |               |                    |
| <b>Age</b>                           | 15         | 0.98                                                             | 0.85-1.13     | 0.81               |

<sup>a</sup>Median value of CD8 density was used as cutoff. Pre CCRT group: <94.2 vs ≥94.2; Post CCRT group: <149.2 vs ≥149.2

Abbreviations: HR, Hazard Ratio; CI, confidence interval; CCRT, concurrent chemoradiation therapy

**Table S5. Literature review of PD-L1 expression rate in ESCC studies.**

| <b>Patient numbers</b> | <b>Ethnicity</b> | <b>PD-L1 expression rate</b> | <b>PDL1_Overall Survival (OS)</b>                                                                                                                                                                                                                                      | <b>Publications</b> |
|------------------------|------------------|------------------------------|------------------------------------------------------------------------------------------------------------------------------------------------------------------------------------------------------------------------------------------------------------------------|---------------------|
| 536                    | Chinese          | 117/349 (33.5%)              | Survival analysis (poor prognosis, P = 0.047)                                                                                                                                                                                                                          | (1)                 |
| 162                    | Chinese          | 74/162 (45%)                 | Survival analysis (poor prognosis, P = 0.000);<br>Multivariate analysis (poor prognosis, OR=0.380, 95%CI=0.200-0.648, P = 0.001)                                                                                                                                       | (2)                 |
| 233                    | Chinese          | 129/233 (55.4%)              | Survival analysis (good prognosis, P = 0.023);<br>Multivariate analysis (good prognosis, HR=0.697, 95%CI=0.498-0.976, P = 0.035)                                                                                                                                       | (3)                 |
| 246                    | Chinese          | 60/246 (24.4%)               | Survival analysis in OP only (not significant, P = 0.706);<br>Survival analysis in post chemotherapy (poor prognosis, P = 0.765);<br>Survival analysis in post radiotherapy (poor prognosis, P = 0.047);<br>Survival analysis in post CCRT (poor prognosis, P = 0.061) | (4)                 |
| 106                    | Chinese          | 57/106 (46.2%)               | Survival analysis (poor prognosis, P = 0.027)                                                                                                                                                                                                                          | (5)                 |
| 338                    | Chinese          | 113/378 (29.9%)              | Survival analysis (not significant, P = 0.140);<br>Multivariate analysis (not significant, HR= 0.882, 95%CI = 0.648–1.200, P = 0.423)                                                                                                                                  | (6)                 |
| 146                    | Chinese          | 90/146(61.7%)                | Survival analysis (poor prognosis, P = 0.010);<br>Multivariate analysis (poor prognosis, HR= 1.643, 95%CI = 1.038–                                                                                                                                                     | (7)                 |

|                                                        |          |                                               |                                                                                                                                                                                                                   |      |
|--------------------------------------------------------|----------|-----------------------------------------------|-------------------------------------------------------------------------------------------------------------------------------------------------------------------------------------------------------------------|------|
|                                                        |          |                                               | 2.601, P = 0.034)                                                                                                                                                                                                 |      |
| 133                                                    | Chinese  | 56/133 (42.1%)                                | Survival analysis (poor prognosis, P = 0.01);<br>Multivariate analysis (poor prognosis, HR=1.957, 95%CI: 1.303–2.939, P = 0.001)                                                                                  | (8)  |
| 279                                                    | Chinese  | Intraepithelial:<br>74.28%; Tumor:<br>32.59%  | Survival analysis (poor prognosis, P = 0.046)                                                                                                                                                                     | (9)  |
| 138 (82 had<br>paired pre-<br>and post-<br>CRT)        | Chinese  | 57/138 (41.3%)                                | Survival analysis (not significant, P = 0.133);<br>Univariate analysis (not significant, HR=0.642, 95%CI: 0.360–1.145, P = 0.133)                                                                                 | (10) |
| 41                                                     | Japanese | qPCR: 15/31<br>(48.4%); IHC:<br>13/31 (41.9%) | Survival analysis (poor prognosis, P = 0.025);<br>Multivariate analysis (poor prognosis, P = 0.0001 without detailing data)                                                                                       | (11) |
| 90                                                     | Japanese | 17/91(18.9%)                                  | Survival analysis (poor prognosis, P = 0.027);<br>Multivariate analysis with HLA class I (poor prognosis, HR=2.95, 95%<br>C=1.03-7.50, P = 0.0447)                                                                | (12) |
| 111 with<br>chemotherapy<br>69 without<br>chemotherapy | Japanese | 53/180 (29.4%)                                | Survival analysis (poor prognosis, P =0.0010);<br>Survival analysis with chemotherapy (poor prognosis, P = 0.0064);<br>Multivariate analysis (poor prognosis, HR= 1.7480, 95%CI = 1.1373–<br>2.6578, P = 0.0114); | (13) |
| 90                                                     | Japanese | 57/90 (63.3%)                                 | Survival analysis (poor prognosis, P = 0.0112);                                                                                                                                                                   | (14) |

|                                                                                                                        |          |                                                                                 |                                                                                                                                                                                                              |      |
|------------------------------------------------------------------------------------------------------------------------|----------|---------------------------------------------------------------------------------|--------------------------------------------------------------------------------------------------------------------------------------------------------------------------------------------------------------|------|
|                                                                                                                        |          |                                                                                 | Multivariate analysis (poor prognosis, HR=1.957, 95%CI: 1.303–2.939, P = 0.001)                                                                                                                              |      |
| 76                                                                                                                     | Japanese | Tumor<br>30/76(39.5%);<br>Stroma<br>39/76(51.3%)                                | Survival analysis in tumor (not significant, P = 0.84);<br>Survival analysis in stroma (good prognosis, P = 0.04);<br>Multivariate analysis in stroma (good prognosis, HR= 0.45, 95%CI = 0.23-0.85, P <0.05) | (15) |
| 19 with pre-<br>and post-CRT<br>paired tissue<br>9 with<br>Chemotherapy<br>alone<br>45 with only<br>Post-CRT<br>tissue | Korean   | 41/73(56.2%)                                                                    | Survival analysis (poor prognosis, P = 0.020);<br>Multivariate analysis (poor prognosis, HR= 2.29, 95%CI = 1.12–4.69, P = 0.023)                                                                             | (16) |
| 200                                                                                                                    | Korean   | 67/200(33.5%)                                                                   | Survival analysis (not significant, P=0.656)                                                                                                                                                                 | (17) |
| 58                                                                                                                     | Korean   | CPS>=1 29/51<br>(56.9%); CPS>=10,<br>14/51 (27.5%);<br>CPS>=20, 9/51<br>(17.6%) | Better OS trend in CPS >=10 (Not significant)                                                                                                                                                                | (18) |



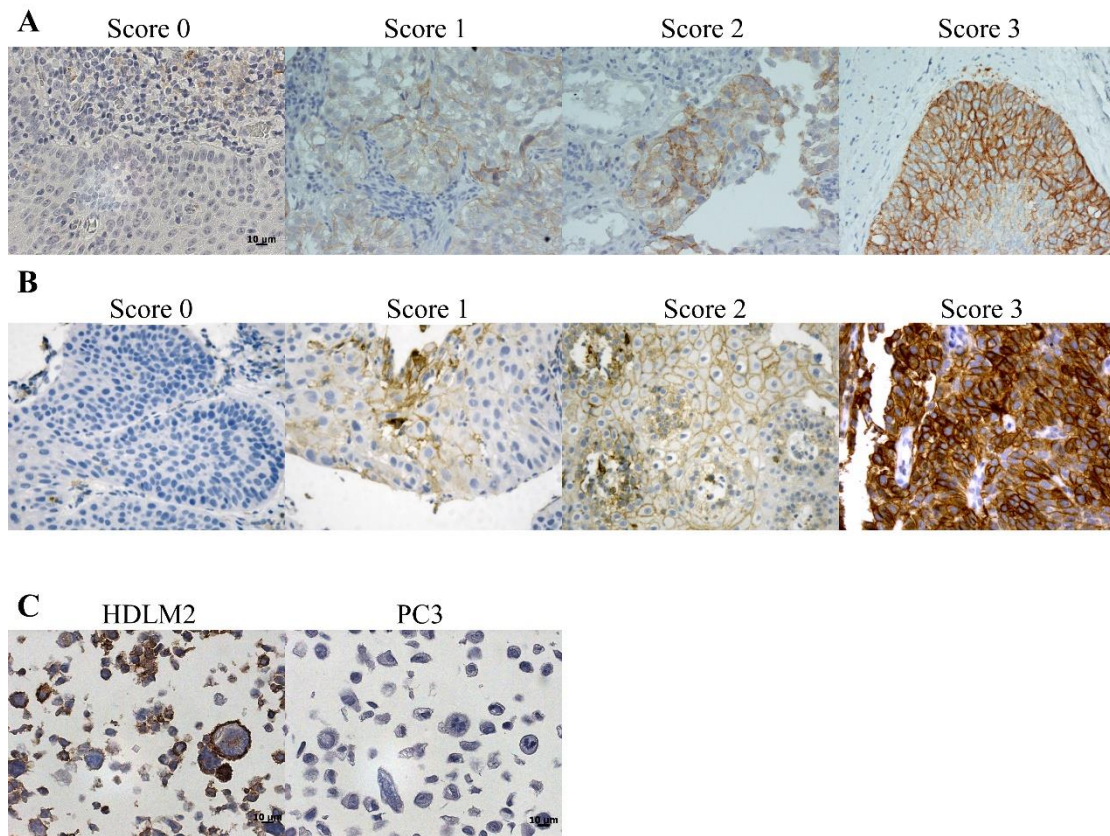

**Figure S1. Scoring criteria of PD-L1 immunohistochemistry staining and antibody specificity validation. All images were taken under 200 × magnification.**  
A) Representative images of membrane intensity score by E1L3N clone.; B) Representative images of membrane intensity score by 22C3 clone.; C) The presence and absence of anti-PD-L1 antibody E1L3N clone signals in positive control HDLM2 cells, and in negative control PC3 cells

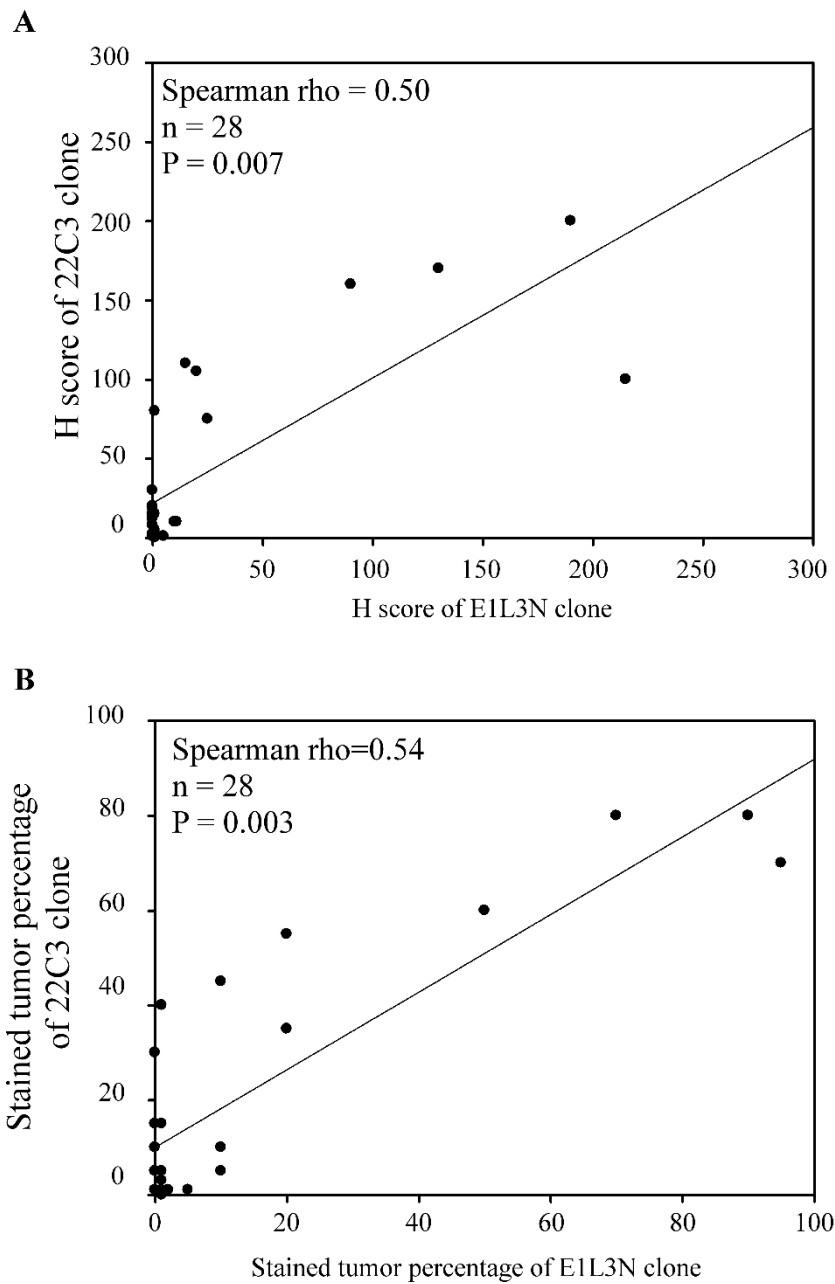

**Figure S2. Analysis of PD-L1 antibody sensitivity from 28 specimens.** A) Scatter plot comparing the H scores between E1L3N and 22C3 clone;  
B) Scatter plot comparing the stained tumor proportion between E1L3N and 22C3 clone

## References

1. Chen K, Cheng G, Zhang F, Zhang N, Li D, Jin J, *et al.* Prognostic significance of programmed death-1 and programmed death-ligand 1 expression in patients with esophageal squamous cell carcinoma. *Oncotarget* **2016**;7(21):30772-80 doi 10.18632/oncotarget.8956.
2. Chen MF, Chen PT, Chen WC, Lu MS, Lin PY, Lee KD. The role of PD-L1 in the radiation response and prognosis for esophageal squamous cell carcinoma related to IL-6 and T-cell immunosuppression. *Oncotarget* **2016**;7(7):7913-24 doi 10.18632/oncotarget.6861.
3. Guo W, Zhang F, Shao F, Wang P, Li Z, Yang X, *et al.* PD-L1 expression on tumor cells associated with favorable prognosis in surgically resected esophageal squamous cell carcinoma. *Hum Pathol* **2019**;84:291-8 doi 10.1016/j.humpath.2018.09.014.
4. Jiang C, Zhu Y, Tang S, Zhang G, Lin Q, Xu Y, *et al.* High PD-L1 expression is associated with a favorable prognosis in patients with esophageal squamous cell carcinoma undergoing postoperative adjuvant radiotherapy. *Oncol Lett* **2019**;17(2):1626-34 doi 10.3892/ol.2018.9747.
5. Leng C, Li Y, Qin J, Ma J, Liu X, Cui Y, *et al.* Relationship between expression of PD-L1 and PD-L2 on esophageal squamous cell carcinoma and the antitumor effects of CD8(+) T cells. *Oncol Rep* **2016**;35(2):699-708 doi 10.3892/or.2015.4435.
6. Rong L, Liu Y, Hui Z, Zhao Z, Zhang Y, Wang B, *et al.* PD-L1 expression and its clinicopathological correlation in advanced esophageal squamous cell carcinoma in a Chinese population. *Diagn Pathol* **2019**;14(1):6 doi 10.1186/s13000-019-0778-4.
7. Wang Q, Feng F, Wang F, Liu Z, Liu S, Xu G, *et al.* PD-L1 Expression On tumor Cells Was Associated With Unfavorable Prognosis In Esophageal Squamous Cell Carcinoma. *J Cancer* **2018**;9(12):2224-31 doi 10.7150/jca.24493.
8. Zhu Y, Li M, Mu D, Kong L, Zhang J, Zhao F, *et al.* CD8+/FOXP3+ ratio and PD-L1 expression associated with survival in pT3N0M0 stage esophageal squamous cell cancer. *Oncotarget* **2016**;7(44):71455-65 doi 10.18632/oncotarget.12213.
9. Pan C, Wang Y, Liu Q, Hu Y, Fu J, Xie X, *et al.* Phenotypic profiling and prognostic significance of immune infiltrates in esophageal squamous cell carcinoma. *Oncoimmunology* **2021**;10(1):1883890 doi 10.1080/2162402X.2021.1883890.
10. Zhou S, Yang H, Zhang J, Wang J, Liang Z, Liu S, *et al.* Changes in Indoleamine

- 2,3-Dioxygenase 1 Expression and CD8+ Tumor-Infiltrating Lymphocytes after Neoadjuvant Chemoradiation Therapy and Prognostic Significance in Esophageal Squamous Cell Carcinoma. *Int J Radiat Oncol Biol Phys* **2020**;108(1):286-94 doi 10.1016/j.ijrobp.2020.01.020.
11. Ohigashi Y, Sho M, Yamada Y, Tsurui Y, Hamada K, Ikeda N, *et al.* Clinical significance of programmed death-1 ligand-1 and programmed death-1 ligand-2 expression in human esophageal cancer. *Clin Cancer Res* **2005**;11(8):2947-53 doi 10.1158/1078-0432.CCR-04-1469.
  12. Ito S, Okano S, Morita M, Saeki H, Tsutsumi S, Tsukihara H, *et al.* Expression of PD-L1 and HLA Class I in Esophageal Squamous Cell Carcinoma: Prognostic Factors for Patient Outcome. *Ann Surg Oncol* **2016**;23(Suppl 4):508-15 doi 10.1245/s10434-016-5376-z.
  13. Tanaka K, Miyata H, Sugimura K, Kanemura T, Hamada-Uematsu M, Mizote Y, *et al.* Negative influence of programmed death-1-ligands on the survival of esophageal cancer patients treated with chemotherapy. *Cancer Sci* **2016**;107(6):726-33 doi 10.1111/cas.12938.
  14. Tsutsumi S, Saeki H, Nakashima Y, Ito S, Oki E, Morita M, *et al.* Programmed death-ligand 1 expression at tumor invasive front is associated with epithelial-mesenchymal transition and poor prognosis in esophageal squamous cell carcinoma. *Cancer Sci* **2017**;108(6):1119-27 doi 10.1111/cas.13237.
  15. Ito N, Tsujimoto H, Horiguchi H, Shimazaki H, Miyazaki H, Saitoh D, *et al.* Clinical Significance of Programmed Death Ligand-1 Expression in Esophageal Squamous Cell Carcinoma. *J Surg Res* **2020**;251:321-8 doi 10.1016/j.jss.2020.02.013.
  16. Lim SH, Hong M, Ahn S, Choi YL, Kim KM, Oh D, *et al.* Changes in tumour expression of programmed death-ligand 1 after neoadjuvant concurrent chemoradiotherapy in patients with squamous oesophageal cancer. *Eur J Cancer* **2016**;52:1-9 doi 10.1016/j.ejca.2015.09.019.
  17. Kim R, Keam B, Kwon D, Ock CY, Kim M, Kim TM, *et al.* Programmed death ligand-1 expression and its prognostic role in esophageal squamous cell carcinoma. *World J Gastroenterol* **2016**;22(37):8389-97 doi 10.3748/wjg.v22.i37.8389.
  18. Lee J, Kim B, Jung HA, La Choi Y, Sun JM. Nivolumab for esophageal squamous cell carcinoma and the predictive role of PD-L1 or CD8 expression in its therapeutic effect. *Cancer Immunol Immunother* **2021**;70(5):1203-11 doi 10.1007/s00262-020-02766-7.
